# Supplementary material for: Maximizing hydrogen production by AB hydrolysis with Pt@cobalt oxide/N,O-rich carbon and alkaline ultrasonic irradiation
Source: Royal Society of Chemistry journal article supplement (doi:10.1039/d1qi01629f), 2022-01-01
Supplement: d1qi01629f1.pdf [file d1qi01629f1.pdf]

## Supporting Information

### Experimental

#### Reagents and materials

Ethylenediaminetetraacetic acid disodium cobalt salt hydrate ( $\text{Na}_2\text{CoEDTA}$ ), Hexachloroplatinic acid hexahydrate ( $\text{H}_2\text{PtCl}_6 \cdot 6\text{H}_2\text{O}$ , 99.9 %), Ammonia borane ( $\text{NH}_3\text{BH}_3$ , 98 %), sodium hydroxide ( $\text{NaOH}$ ) were purchased from Aladdin. Deuterium oxide ( $\text{D}_2\text{O}$ ) was obtained from Innochem. All other reagents were commercially available and used without further purification.

#### Characterizations

The morphology and structure of the samples were characterized using transmission electron microscopy (TEM) on a JEOL JEM-2100 FEGTEM. The morphology and distribution of element of the catalysts were tested by scanning electron microscopy (SEM, Sigma 500 field emission scanning electron microscope). Powder X-ray diffraction (XRD) was performed on Rigaku D/Max-2400X with Cu K $\alpha$  radiation. X-ray photoelectron spectroscopy (XPS) spectra were obtained from an ESCALABMKLL X-ray photoelectron spectrometer using an Al K $\alpha$  source. The thermo gravimetric analysis (TGA) was measured using Diamond TG/DTA instruments (STA 449C Jupiter, Netzsch) under a nitrogen atmosphere up to 800 °C with a heating rate of 5.0 °C min<sup>-1</sup>. Surface Areas were determined by BET measurements using an Autosorb-1 Surface Area Analyzers (Quanta chrome Instrument Corporation).

#### Calculation

The TOF value was determined based on the reported literature using the eq.(S1)

$$TOF = \frac{P_{atm}/RT}{n_{Pt}t} \quad (S1)$$

where  $P_{atm}$  is the atmospheric pressure (101325 Pa),  $V_{H_2}$  is the volume of generated hydrogen when conversion rate of 50 %,  $R$  represents the ideal gas constant (8.314 J mol<sup>-1</sup>·K<sup>-1</sup>),  $T$  is the reaction temperature (K),  $n_{Pt}$  is the total mole number of Pt atoms in catalyst, and  $t$  is the reaction time.

The catalysts nearly show zero-order reaction kinetics with respect to ammonia borane in the reaction period. Therefore, the reaction rate law could be described as:

$$r = k \quad (S2)$$

where  $k$  is the reaction constant.

The KIE was determined on the basis of the reported literature using the eq.(S3)

$$KIE = k_H / k_D \quad (S3)$$

where  $k_H$  is the reaction constant of the reaction in H<sub>2</sub>O,  $k_D$  is the reaction constant of the reaction in D<sub>2</sub>O.

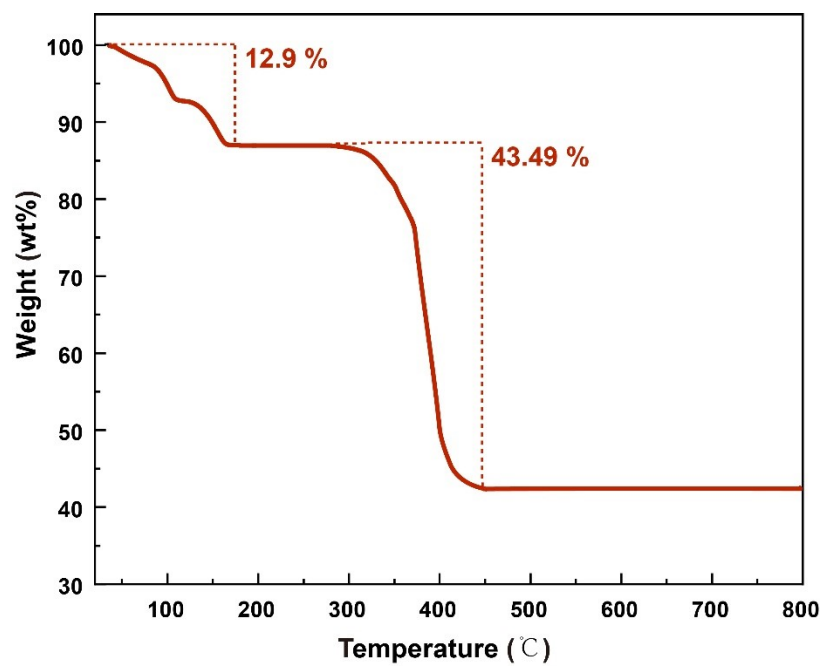

**Fig. S1.** TGA analysis in air atmosphere for Na<sub>2</sub>CoEDTA.

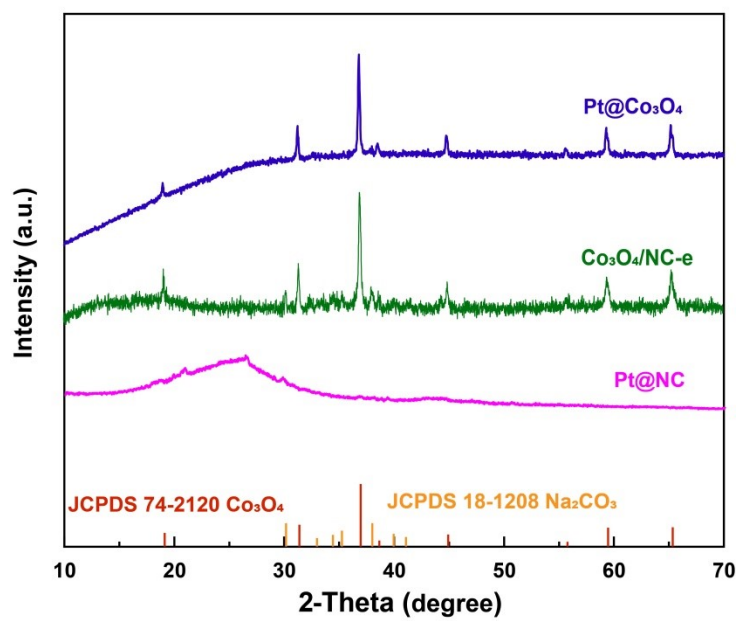

**Fig. S2.** XRD patterns of Pt@Co<sub>3</sub>O<sub>4</sub>, Co<sub>3</sub>O<sub>4</sub>/NC-e, and Pt@NC.

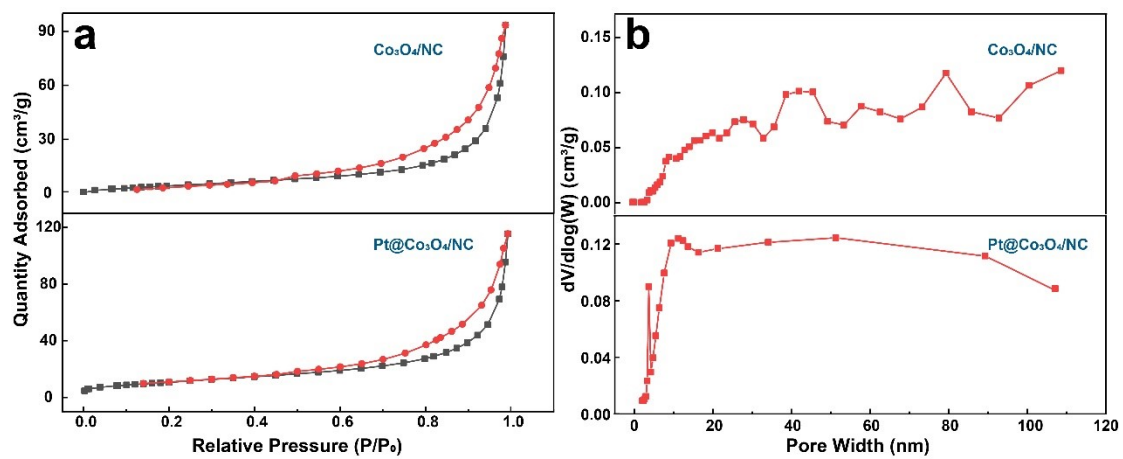

**Fig. S3.** (a) Nitrogen adsorption-desorption isotherms, and (b) pore size distributions of  $\text{Co}_3\text{O}_4/\text{NC}$  and  $\text{Pt}@\text{Co}_3\text{O}_4/\text{NC}$ .

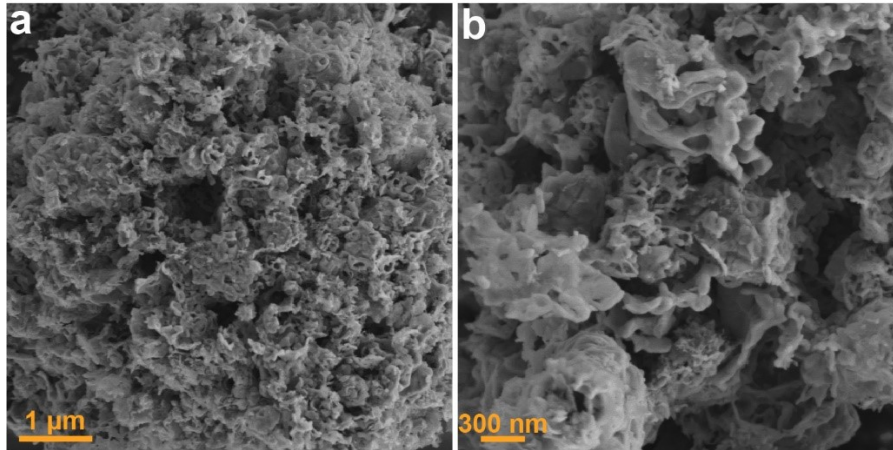

**Fig. S4.** (a,b) SEM images of Co<sub>3</sub>O<sub>4</sub>/NC.

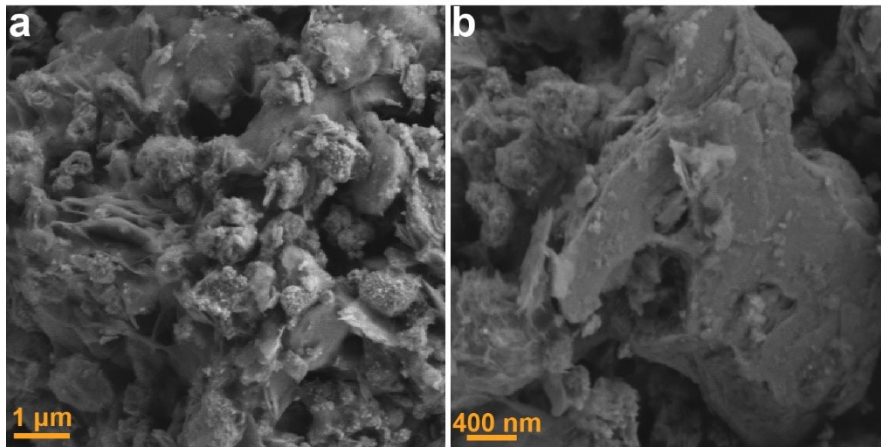

**Fig. S5.** (a,b) SEM images of contrastive sample Pt@Co<sub>3</sub>O<sub>4</sub>.

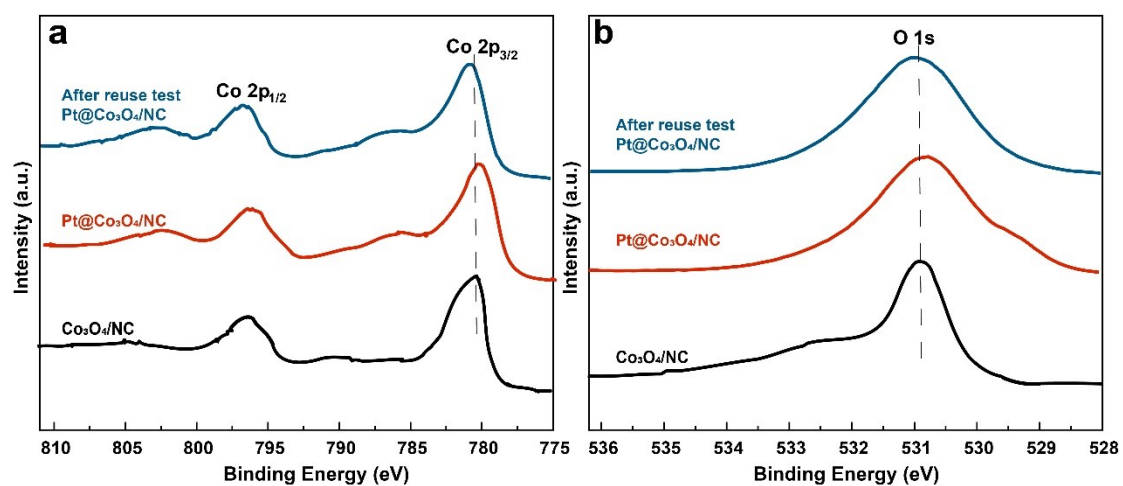

**Fig. S6.** High-resolution Co 2p (a) and O 1s (b) XPS scan of the pure Co<sub>3</sub>O<sub>4</sub>/NC and Pt@Co<sub>3</sub>O<sub>4</sub>/NC before and after the reuse test.



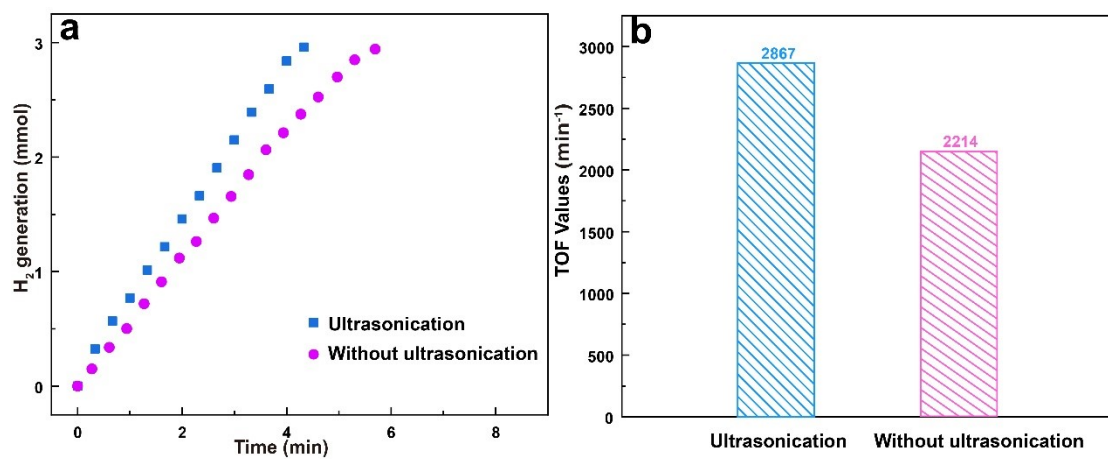

**Fig. S7.** (a) H<sub>2</sub> generation vs time graph under different operating methods for AB hydrolysis at 298 K and (b) the corresponding TOF values of (a).

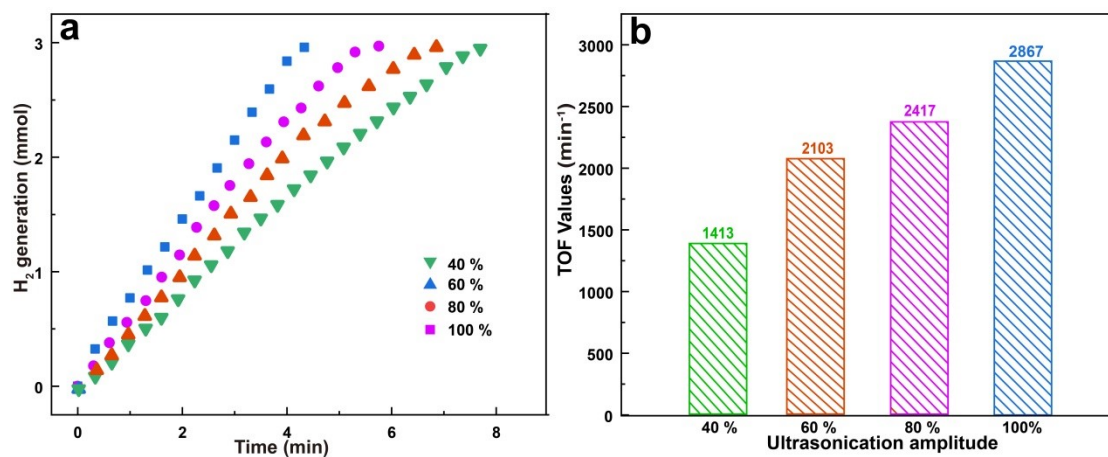

**Fig. S8.** (a) Time dependences of hydrogen production from hydrolytic dehydrogenation of AB at varied ultrasonication amplitudes and (b) the corresponding TOF values of (a).

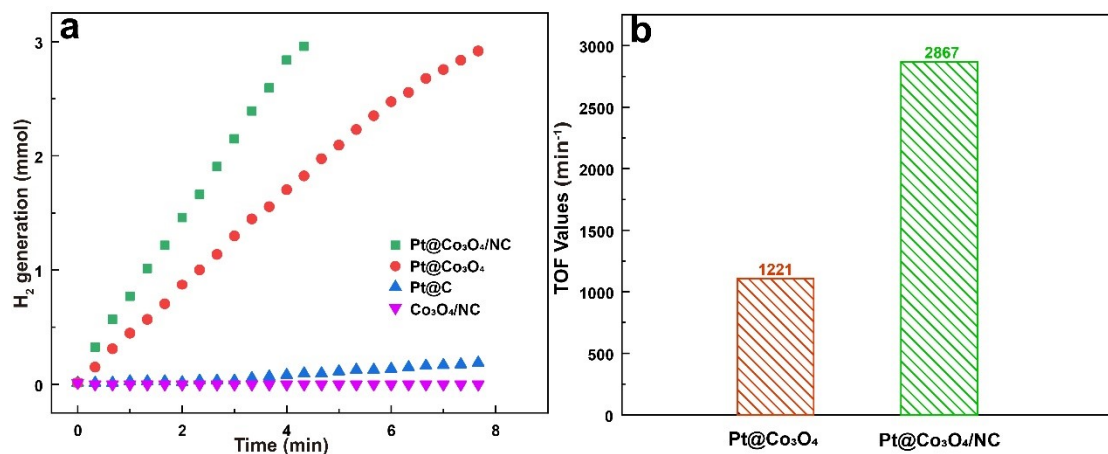

**Fig. S9.** (a) H<sub>2</sub> generation vs time graph over different catalysts for AB hydrolysis at 298 K and (b) the corresponding TOF values of (a).

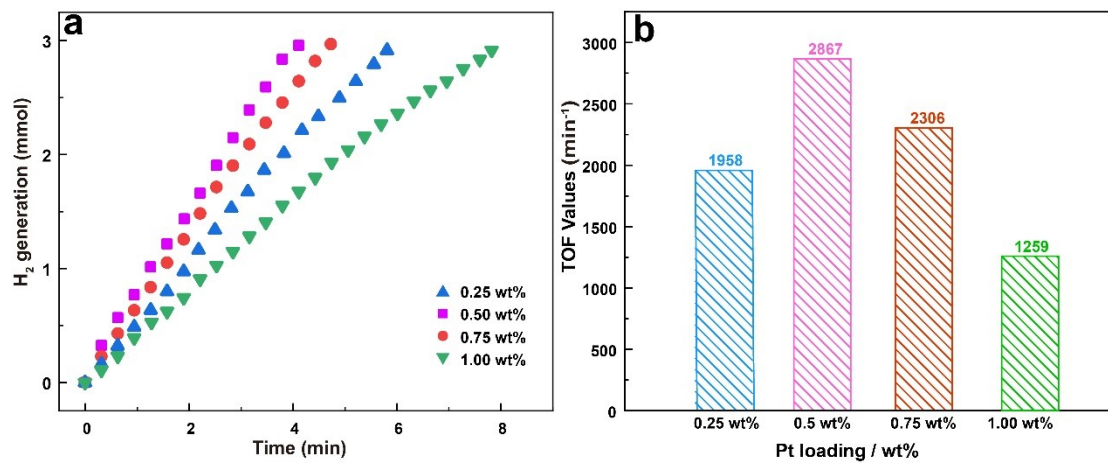

**Fig. S10.** (a) Effect of catalyst loadings on the catalytic activity of Pt@Co<sub>3</sub>O<sub>4</sub>/NC. (b) Corresponding TOF values of (a).

**Table S1.** Comparison of catalytic activity, activation energy, and durability of Pt-based catalysts during the AB hydrolysis.

| Catalysts                             | TOF<br>(min <sup>-1</sup> ) | Ea<br>(kJ·mol <sup>-1</sup> ) | Recycling<br>times | Retained<br>activity<br>(%) | Refs |
|---------------------------------------|-----------------------------|-------------------------------|--------------------|-----------------------------|------|
| Pt@SiO <sub>2</sub>                   | 158.6                       | 53.9                          | 5                  | -                           | [1]  |
| Pt@MIL-101                            | 414                         | 40.7                          | -                  | -                           | [2]  |
| Pt(8%)/CCF-500                        | 35                          | 39.2                          | 5                  | 47%                         | [3]  |
| Pt20/CNT                              | 416.5                       | 48.3                          | 4                  | 40%                         | [4]  |
| Pt/CNT-10W                            | 558                         | 29                            | 5                  | 68%                         | [5]  |
| Pt/C                                  | 111                         | -                             | -                  | -                           | [6]  |
| Pt/CNT-P                              | 141.7                       | -                             | 5                  | 24%                         | [7]  |
| Pt-CeO <sub>2</sub>                   | 133                         | -                             | 5                  | 66%                         | [8]  |
| Pt25@TiO <sub>2</sub>                 | 311                         | -                             | 3                  | 75%                         | [9]  |
| Pt/CeO <sub>2</sub> /RGO              | 48                          | -                             | 5                  | 90%                         | [10] |
| Pt/CNTs-O-HT                          | 468                         | -                             | -                  | -                           | [11] |
| Pd-Pt alloy                           | 51.9                        | -                             | 5                  | -                           | [12] |
| PtNi@SiO <sub>2</sub>                 | 20.7                        | 54.76                         | 5                  | 73%                         | [13] |
| Pt-CoCu@SiO <sub>2</sub>              | 272.8                       | 51.01                         | 6                  | -                           | [14] |
| Pt <sub>0.65</sub> Ni <sub>0.35</sub> | 44.3                        | 39                            | -                  | -                           | [15] |
| SiO <sub>2</sub> @Pt@NGO              | 324.6                       | -                             | 6                  | 58%                         | [16] |
| Pt-PVP/SiO <sub>2</sub> (M)           | 371                         | 46.2                          | 5                  | -                           | [17] |
| Pt-Ru@PVP NPs                         | 308                         | 56.3                          | 5                  | 72%                         | [18] |
| Pd-Pt@PVP NPs                         | 125                         | 51.7                          | 5                  | 61%                         | [19] |

|                                                   |             |              |           |            |                  |
|---------------------------------------------------|-------------|--------------|-----------|------------|------------------|
| Co <sub>0.32</sub> Pt <sub>0.68</sub> /C          | 67          | 41.5         | -         | -          | [20]             |
| NP-Pt <sub>40</sub> Co <sub>60</sub>              | 131         | 38.8         | 5         | 65%        | [21]             |
| PtRu                                              | 59.6        | 38.9         | 5         | 70%        | [22]             |
| Pt <sub>58</sub> Ni <sub>33</sub> Au <sub>9</sub> | 496         | -            | 5         | -          | [23]             |
| Pt/graphene                                       | 107         | -            | 5         | 81.2%      | [24]             |
| Pt@PC-POPs                                        | 55          | -            | 5         | -          | [25]             |
| Pt@CF-12                                          | 139         | 31           | 7         | 24%        | [26]             |
| <b>Pt@Co<sub>3</sub>O<sub>4</sub>/NC</b>          | <b>2867</b> | <b>32.09</b> | <b>10</b> | <b>85%</b> | <b>This work</b> |

---

## References:

- [1] Y. Hu, Y. Wang, Z.-H. Lu, X. Chen, L. Xiong, Core-shell nanospheres Pt@SiO<sub>2</sub> for catalytic hydrogen production, *Appl. Surf. Sci.* 341 (2015) 185-189.
- [2] A. Aijaz, A. Karkamkar, Y.J. Choi, N. Tsumori, E. Rönnebro, T. Autrey, H. Shioyama, Q. Xu, Immobilizing Highly catalytically active Pt nanoparticles inside the pores of metal-organic framework: a double solvents approach, *J. Am. Chem. Soc.* 134(34) (2012) 13926-13929.
- [3] M. Yuan, Z. Cui, J. Yang, X. Cui, M. Tian, D. Xu, J. Ma, Z. Dong, Ultrafine platinum nanoparticles modified on cotton derived carbon fibers as a highly efficient catalyst for hydrogen evolution from ammonia borane, *Int. J. Hydrogen Energy* 42(49) (2017) 29244-29253.
- [4] J. Zhang, C. Chen, S. Chen, Q. Hu, Z. Gao, Y. Li, Y. Qin, Highly dispersed Pt nanoparticles supported on carbon nanotubes produced by atomic layer deposition for

hydrogen generation from hydrolysis of ammonia borane, *Catal Sci Technol* 7(2) (2017) 322-329.

[5] W. Chen, W. Fu, G. Qian, B. Zhang, D. Chen, X. Duan, X. Zhou, Synergistic Pt-WO<sub>3</sub> dual active sites to boost hydrogen production from ammonia borane, *iScience* 23(3) (2020) 100922.

[6] M. Chandra, Q. Xu, Room temperature hydrogen generation from aqueous ammonia-borane using noble metal nano-clusters as highly active catalysts, *J. Power Sources* 168(1) (2007) 135-142.

[7] W. Chen, X. Duan, G. Qian, D. Chen, X. Zhou, Carbon nanotubes as support in the platinum-catalyzed hydrolytic dehydrogenation of ammonia borane, *ChemSusChem* 8(17) (2015) 2927-2931.

[8] X. Wang, D. Liu, S. Song, H. Zhang, Synthesis of highly active Pt-CeO<sub>2</sub> hybrids with tunable secondary nanostructures for the catalytic hydrolysis of ammonia borane, *Chem. Commun.* 48(82) (2012) 10207-10209.

[9] M.A. Khalily, H. Eren, S. Akbayrak, H.H. Susapto, N. Biyikli, S. Özkar, M.O. Guler, Facile synthesis of three-dimensional Pt-TiO<sub>2</sub> nano-networks: a highly active catalyst for the hydrolytic dehydrogenation of ammonia-borane, *Angew. Chem. Int. Ed.* 55(40) (2016) 12257-12261.

[10] X. Wang, D. Liu, S. Song, H. Zhang, Graphene oxide induced formation of Pt-CeO<sub>2</sub> hybrid nanoflowers with tunable CeO<sub>2</sub> thickness for catalytic hydrolysis of ammonia borane, *Chem-Eur J* 19(25) (2013) 8082-8086.

[11] W. Chen, J. Ji, X. Duan, G. Qian, P. Li, X. Zhou, D. Chen, W. Yuan, Unique

reactivity in Pt/CNT catalyzed hydrolytic dehydrogenation of ammonia borane, *Chem. Commun.* 50(17) (2014) 2142-2144.

[12] Z. Zhang, Y. Jiang, M. Chi, Z. Yang, C. Wang, X. Lu, Electrospun polyacrylonitrile nanofibers supported alloyed Pd–Pt nanoparticles as recyclable catalysts for hydrogen generation from the hydrolysis of ammonia borane, *RSC Adv.* 5(114) (2015) 94456-94461.

[13] X. Qi, X. Li, B. Chen, H. Lu, L. Wang, G. He, Highly active nanoreactors: patchlike or thick Ni coating on Pt nanoparticles based on confined catalysis, *ACS Appl. Mater. Interfaces* 8(3) (2016) 1922-1928.

[14] Y. Ge, Z.H. Shah, X.-J. Lin, R. Lu, Z. Liao, S. Zhang, Highly efficient Pt decorated CoCu bimetallic nanoparticles protected in silica for hydrogen production from ammonia–borane, *ACS Sustainable Chem. Eng.* 5(2) (2017) 1675-1684.

[15] X. Yang, F. Cheng, J. Liang, Z. Tao, J. Chen,  $Pt_xNi_{1-x}$  nanoparticles as catalysts for hydrogen generation from hydrolysis of ammonia borane, *Int. J. Hydrogen Energy* 34(21) (2009) 8785-8791.

[16] W. Ye, Y. Ge, Z. Gao, R. Lu, S. Zhang, Enhanced catalytic activity and stability of Pt nanoparticles by surface coating of nanosized graphene oxide for hydrogen production from hydrolysis of ammonia–borane, *Sustainable Energy & Fuels* 1(10) (2017) 2128-2133.

[17] J.-T. Du, H. Niu, H. Wu, X.-F. Zeng, J.-X. Wang, J.-F. Chen, PVP-stabilized platinum nanoparticles supported on modified silica spheres as efficient catalysts for hydrogen generation from hydrolysis of ammonia borane, *Int. J. Hydrogen Energy*



46(49) (2021) 25081-25091.

[18] M. Rakap, Hydrogen generation from hydrolysis of ammonia borane in the presence of highly efficient poly(N-vinyl-2-pyrrolidone)-protected platinum-ruthenium nanoparticles, *Appl. Catal., A* 478 (2014) 15-20.

[19] M. Rakap, Poly(N-vinyl-2-pyrrolidone)-stabilized palladium-platinum nanoparticles-catalyzed hydrolysis of ammonia borane for hydrogen generation, *J. Power Sources* 276 (2015) 320-327.

[20] X. Yang, F. Cheng, Z. Tao, J. Chen, Hydrolytic dehydrogenation of ammonia borane catalyzed by carbon supported Co core-Pt shell nanoparticles, *J. Power Sources* 196(5) (2011) 2785-2789.

[21] Q. Zhou, C. Xu, Nanoporous PtCo/Co<sub>3</sub>O<sub>4</sub> composites with high catalytic activities toward hydrolytic dehydrogenation of ammonia borane, *J. Colloid Interface Sci.* 508 (2017) 542-550.

[22] Q. Zhou, C. Xu, Nanoporous PtRu alloys with unique catalytic activity toward hydrolytic dehydrogenation of ammonia borane, *Chemistry – An Asian Journal* 11(5) (2016) 705-712.

[23] J.-X. Kang, T.-W. Chen, D.-F. Zhang, L. Guo, PtNiAu trimetallic nanoalloys enabled by a digestive-assisted process as highly efficient catalyst for hydrogen generation, *Nano Energy* 23 (2016) 145-152.

[24] D. Ke, J. Wang, H. Zhang, Y. Li, L. Zhang, X. Zhao, S. Han, Fabrication of Pt-Co NPs supported on nanoporous graphene as high-efficient catalyst for hydrolytic dehydrogenation of ammonia borane, *Int. J. Hydrogen Energy* 42(43) (2017) 26617-

26625.

[25] H. Zhao, G. Yu, M. Yuan, J. Yang, D. Xu, Z. Dong, Ultrafine and highly dispersed platinum nanoparticles confined in a triazinyl-containing porous organic polymer for catalytic applications, *Nanoscale* 10(45) (2018) 21466-21474.

[26] J.R. Deka, C.S. Budi, C.-H. Lin, D. Saikia, Y.-C. Yang, H.-M. Kao, Carboxylic acid functionalized cage-type mesoporous silica FDU-12 as support for controlled synthesis of platinum nanoparticles and their catalytic applications, *Chem–Eur J* 24(51) (2018) 13540-13548.
